# Supplementary material
Source: publisher figshare collection journal article supplement (https://sage.figshare.com/ndownloader/files/11903804)
Supplement: Supplementary file 1 [file 11903804]

**Appendix Table 1. Likelihood of First All-cause Hospitalization, Stroke/Systemic Embolism (SE)-related Hospitalization, and Major Bleeding (MB)-related Hospitalization During the Follow-up Among Nonvalvular Atrial Fibrillation Patients Treated with Other Oral Anticoagulants vs. Apixaban**

|                                          | <b>Hazard Ratio*</b> | <b>95% Confidence Interval</b> | <b>p-value</b> |
|------------------------------------------|----------------------|--------------------------------|----------------|
| <b>First All-cause Hospitalization</b>   |                      |                                |                |
| Rivaroxaban vs. Apixaban                 | 1.35                 | 1.26, 1.45                     | p<0.001        |
| Dabigatran vs. Apixaban                  | 1.07                 | 0.94, 1.21                     | p=0.338        |
| Warfarin vs. Apixaban                    | 1.44                 | 1.34, 1.54                     | p<0.001        |
| <b>Stroke/SE-related Hospitalization</b> |                      |                                |                |
| Rivaroxaban vs. Apixaban                 | 1.38                 | 1.05, 1.81                     | p=0.003        |
| Dabigatran vs. Apixaban                  | 1.28                 | 0.83, 1.98                     | p=0.269        |
| Warfarin vs. Apixaban                    | 1.54                 | 1.21, 1.95                     | p<0.001        |
| <b>MB-related Hospitalization</b>        |                      |                                |                |
| Rivaroxaban vs. Apixaban                 | 2.05                 | 1.71, 2.44                     | p<0.001        |
| Dabigatran vs. Apixaban                  | 1.22                 | 0.88, 1.70                     | p=0.232        |
| Warfarin vs. Apixaban                    | 1.88                 | 1.58, 2.22                     | p<0.001        |

\*Hazard ratios do not include readmissions.
